# Supplementary material for: COUP-TFI promotes radial migration and proper morphology of callosal projection neurons by repressing Rnd2 expression
Source: Oxford University Press journal article supplement (doi:10.1242/dev.068031), 2011-09-30
Supplement: dev068031tables2.pdf [file dev068031tables2.pdf]

**Table S2. Sequences of primers used in QPCR and ChIP experiments**

| <b>Primers used for QPCR on mRNA extracted from WT and <i>COUP-TFI</i> KO embryos (Fig. 4A)</b> |                       |                      |
|-------------------------------------------------------------------------------------------------|-----------------------|----------------------|
| mRNA                                                                                            | Forward (5'-3')       | Reverse (5'-3')      |
| <i>Ngn2</i>                                                                                     | GACATTCCCGACACACAC    | CCAGCAGCATCAGTACCTCC |
| <i>NeuroD1</i>                                                                                  | CGCTCTCGCTGTATGATTTG  | ACGCAGAAGGCAAGGTGTC  |
| <i>NeuroD2</i>                                                                                  | CTGGAGAGCTGCAGAACCG   | TTTTTCTTTCCTTTGTCCG  |
| <i>Tbr2</i>                                                                                     | AAACACGGATATCACCCAGC  | GGCAAAGTGTGACAAAGGG  |
| <i>Rnd2</i>                                                                                     | GTGTTTGAGAACTACACTGC  | GTGTTTCTGCCGGCTAATG  |
| <b>Primers used to query chromatin enrichment by QPCR (Fig. 4D)</b>                             |                       |                      |
| Primers                                                                                         | Forward (5'-3')       | Reverse (5'-3')      |
| Bs A-A1                                                                                         | CGTTTGACCTTCCACCTTAG  | TCCCACTTGCTTGGCCAGC  |
| Bs B                                                                                            | GAGATTGGACGAATAATTGGC | CTGCCAGGTTTTGAATCTGC |
| Bs C                                                                                            | TCACTGGGTGACTCTTTTCG  | GCAATGCCAGACAATGTGAG |
| Bs D                                                                                            | AGTCCTGAGCTGGCTGGGTCC | TCTCCTCACTAGGGCAACAG |
| mFabp7                                                                                          | CTAACCCAGTGGCCTGAGCA  | TGGGCAGATGGCTCCAAT   |
| mCycloA                                                                                         | AGGTCCTGGCATCTTGTTCCA | GAACCGTTTGTGTTGGTCCA |
